# Supplementary material
Source: PubMed Central journal article supplement (PMC2947905)
Supplement: 1010575107_Appendix.pdf [file 1010575107_Appendix.pdf]

## Supplementary Information

To accompany the manuscript “A heterodimeric complex of the LRR proteins LRIM1 and APL1C regulates complement-like immunity in *Anopheles gambiae*” by Richard H. G. Baxter, Stefanie Steinert, Yogarany Chelliah, Gloria Volohonsky, Elena A. Levashina, & Johann Deisenhofer.

## Molecular weight determination of LRIM1/APL1C complex

LRIM1 and APL1C proteins were purified as described above and analyzed by size-exclusion chromatography in 0.2 M NaCl, 20 mM Na-Hepes pH 7.5, using a Superdex200 16/60 column (GE Healthcare) calibrated with a five-protein gel filtration standard (BioRad). LRIM1/APL1C- $\Delta$ 26-130 was exchanged into PBS and analyzed by DLS at 5 mg/ml, and by sedimentation velocity (SV) at 0.2–1.0 mg/ml. For the latter, the samples (~390  $\mu$ l) were placed in dual-sectored charcoal-filled Epon centerpieces sandwiched between sapphire windows. The samples were centrifuged at 20 °C, 45,000 rpm (An50 Ti) in a Beckman Optima XL-I analytical ultracentrifuge; the interference optical system was used to acquire the data. Data were analyzed using SEDFIT (1) using the following parameters: partial specific volume  $\bar{v} = 0.73$ , buffer density  $\rho = 1.00523$ , buffer viscosity  $\eta = 0.01019$ , which were estimated using SEDNTERP (2). A  $c(s)$  distribution calculated from the SV data demonstrated four peaks: a major one, comprising the LRIM1/APL1C- $\Delta$ 26-130 heterodimer, and three minor peaks, which were probably contaminants. These four sedimenting entities were treated as discrete species in a subsequent analysis, allowing for the calculation of the  $s$ -value and a 68% confidence interval for the heterodimer:  $s = 5.10 \pm 0.04$  S. Combined with the diffusion constant  $D = 3.63 \pm 0.03 \times 10^{-7}$  cm<sup>2</sup>/s determined by DLS, the molecular mass was calculated using the Svedberg equation  $M = sRT/D(1 - \bar{v}\rho) = 131 \pm 1$  kDa, where  $R$  is the gas constant, and  $T$  is the temperature in Kelvin.

## Monosaccharide composition analysis by HPAEC

LRIM1/APL1-Δ26-130 (~375 μg) was hydrolyzed with 2 N trifluoroacetic acid at 100 °C for 4 h. The hydrolysate was lyophilized, redissolved in H<sub>2</sub>O, sonicated for 7 min in ice and transferred to an injection vial. Four concentration of standard mix (0.5, 1.0, 2.0, and 4.0 nmol/injection) were prepared to establish a calibration curve. The number of moles of each sugar in the sample was quantified by linear interpolation from the calibration curve. Sugars were analyzed by HPAEC using a Dionex DX500 system equipped with a GP40 gradient pump, an ED40 electrochemical detector, and a Thermo-Separation AS3500 autosampler containing a stainless steel needle. Individual sugars were separated by a Dionex CarboPac PA20 (3 x 150 mm) analytical column with an amino trap. The gradient programs used eluents A, degassed nanopure water; B, 200 mM NaOH; and C, 100 mM NaOH. All methods were based on protocols previously described(3). Analysis of the monosaccharide composition of LRIM1/APL1C-Δ26-130 is consistent with the empirical formula Fuc<sub>2</sub>Gal<sub>14</sub>Man<sub>17</sub> for seven *N*-linked glycosylation sites with two sites α1,3-fucosylated and an average of 2.4 mannose residues per site, with a total mass of 6.5 kDa.

## Crystallization of LRIM1 and APL1 LRR domains

The LRIM1-LRR domain that was crystallized was generated by expression of a construct consisting of LRIM1 residues 1–332 with a C-terminal 6xHis tag. The APL1C-LRR domain that was crystallized was generated by limited tryptic digest of purified APL1C. Purified LRIM1-LRR was crystallized at 5 mg/ml in 15–20 % (w/v) PEG 8000, 0.1 M Na-Hepes pH 7.5, 0.2 M calcium acetate, 0–10% glycerol, 21 °C. APL1C-LRR crystallized under similar conditions. Crystals were flash-frozen in liquid nitrogen prior to data collection in a cryobuffer containing

15% glycerol. LRIM1-LRR x-ray diffraction data was collected at beamline 19-ID (SBC-CAT) at the Advanced Photon Source, Argonne National Laboratory. Selenomethionine protein suitable for phasing was obtained by introduction of four additional methionine residues (E99M, Y148M, K216M, L310M) by site-directed mutagenesis. APL1C-LRR-ray diffraction data was collected at beamline ID-14-4 at the European Synchrotron Radiation Facility, Grenoble.

## Determination of Crystal Structures

LRIM1-LRR data was processed by *HKL3000* (4), 12 sites found by 2-wavelength MAD with *SHELXD* (5). Initial refinement was performed using *REFMAC5* (6) and model building with *COOT* (7). An initial model comprising the 10 LRR repeats was built in three rounds of manual refinement against the 2.5 Å selenomethionine dataset. Following phase extension to the 2.0 Å native dataset, *ARP/wARP* (8) built the C-terminal region in six rounds with manual editing. Final rounds of refinement including TLS refinement were performed in *PHENIX* (9).

APL1C-LRR and LRIM1/APL1C- $\Delta$ 26-130 data was processed with *XDS* (10). Initial attempts to determine the APL1C-LRR structure by molecular replacement (MR) using LRIM1-LRR as search model were unsuccessful, but a solution for the LRIM1/APL1C- $\Delta$ 26-130 complex was readily obtained. Further MR trials on the complex with other LRR domains from the PDB yielded a solution for APL1C-LRR with a chimera of two solutions using decorin (1XKU 35–252) and biglycan (2FT3 38–227) as search models. This model provided a solution for the APL1C-LRR dataset which was then built automatically by *ARP/wARP* in two rounds with manual editing. The final model was returned to the LRIM1/APL1C- $\Delta$ 26-130 and the remaining model built automatically by *BUCCANEER* (11) in three rounds with manual editing. Final rounds of refinement including TLS refinement were performed in *PHENIX*.

## Crystal structure of LRIM1 and APL1C LRR domains

The structures of LRIM1-LRR and APL1C-LRR were determined to 2.0 Å and 1.85 Å resolution, respectively (Table S2). The final model of LRIM1-LRR contains two complete molecules in the asymmetric unit including the 6xHis tag, with a  $C_\alpha$  rmsd of 0.8 Å for the LRR domain. The final model of APL1C-LRR contains one molecule in the asymmetric unit comprising residues 140–523, except for the disordered loop 147–152.

LRIM1-LRR (Fig. S3A) commences immediately after the signal peptide cleavage site, prefaced by a short antiparallel  $\beta$ -strand. The LRR domain contains ten repeats (eleven parallel  $\beta$ -strands), with two *N*-linked glycosylation sites: Asn 86 on the concave face of LRR III and Asn 132 on the bottom surface of LRR V. APL1C-LRR (Fig. S3B) begins with an N-terminal capping motif (LRRNT) including a disulfide bond between Cys 145 and Cys 154. The LRR domain contains thirteen repeats (fourteen parallel  $\beta$ -strands) with three of four *N*-linked glycosylation sites resolved: Asn 325 on the concave face of LRR VII, Asn 370 on the bottom face of LRR IX, and Asn 476 at the top of the final parallel  $\beta$ -strand (Asn 187 is resolved in the LRIM1/APL1C complex structure). After the final  $\beta$ -strand, LRIM1 Cys 273 at the base of the convex face commences the LRRCT motif containing two disulfide bonds, one between Cys 273 and Cys 318 and one between Cys 305 and Cys 317 (Fig. 2C). APL1C has a similar LRRCT to LRIM1 with disulfide bonds between Cys 486 and Cys 520 and between Cys 508 and Cys 519, but the length and secondary structure in the interval between the disulfide bonds is different between the two structures.

Each repeat of LRIM1 and APL1C-LRRs V–XIII has a distinct secondary structure on the convex face (APL1C LRRs I–IV are regular repeats). LRIM1 and APL1C have unusually large

radii of curvature compared to other LRR structures, 36 Å and 31 Å, respectively (Table S3). This is caused by a decrease in the length of LRRs in the center of the domain (Table S4); specifically LRIM-LRR IV and APL1C-LRR VII are only 19 residues in length, the shortest repeat in an LRR of known structure. Two *N*-linked glycosylation sites in the LRR domain, LRIM1 Asn 86 and APL1 325, and LRIM1 132 and APL1 370, are shifted by one repeat between LRIM1 and APL1C but conserved in their relative position to this short repeat.

### **Immunoprecipitation of the TEP1/LRIM1/APL1C ternary complex**

Rabbit polyclonal antibodies were raised and affinity purified against purified TEP1r (Genscript). A final stage of purification was performed by passage over secreted *T. ni* proteins conjugated to NHS-Sepharose (GE Healthcare) to remove glycan-specific antibodies. 10 µl of protein mixtures following centrifugation was diluted to 1 ml in IP buffer (50 mM Tris-HCl pH 7.8, 100 mM NaCl, 2 mM EDTA, 0.1 µg/ml BSA, 0.1% Tween-20). IP was performed with either αFLAG-M2 agarose (Sigma) or αTEP1r bound to a mixture of protein A/protein G-sepharose (Sigma). Beads were washed twice each with 50 mM Tris-HCl pH 7.8 ± 0.5 M NaCl and eluted by incubation with 2X Laemli buffer. SDS/PAGE was run with 4-20% minigels, transfer to nitrocellulose and Western blotting with monoclonal α6xHis/HRP (Clontech), αFLAG-M2/HRP (Sigma) or αTEP1.

### **Supplementary References**

1. Schuck P, Perugini MA, Gonzales NR, Howlett GJ, & Schubert D (2002) *Biophys J* **82**, 1096-1111.

2. Laue TM, Shah BD, Ridgeway RM, & Pelletier SL (1992) in *Analytical Ultracentrifugation in Biochemistry and Polymer Science*, ed. Harding SE, Rowe, A. J., and Horton, J. C (The Royal Society of Chemistry, Cambridge).
3. Hardy MR & Townsend RR (1994) *Methods Enzymol* **230**, 208-225.
4. Otwinowski Z & Minor W (1997) in *Macromolecular Crystallography*, eds. Carter J, Charles W & Sweet RM (Academic Press, New York), pp. 307-326.
5. Sheldrick GM (2008) *Acta Crystallogr A* **64**, 112-122.
6. Murshudov GM, Vagin AA, & Dodson EJ (1997) *Acta Crystallographica D* **53**, 240-255.
7. Emsley P & Cowtan K (2004) *Acta Crystallogr D Biol Crystallogr* **60**, 2126-2132.
8. Langer GG, Cohen SX, Lamzin VS, & Perrakis A (2008) *Nat Protoc* **3**, 1171-1179.
9. Adams PD, Grosse-Kunstleve RW, Hung LW, Ioerger TR, McCoy AJ, Moriarty NW, Read RJ, Sacchettini JC, Sauter NK, & Terwilliger TC (2002) *Acta Crystallogr D Biol Crystallogr* **58**, 1948-1954.
10. Kabsch W (1988) *Journal of Applied Crystallography* **21**, 916-924.
11. Cowtan K (2006) *Acta Crystallogr D Biol Crystallogr* **62**, 1002-1011.

**Table S1.** HPAEC monosaccharide composition of LR1M1/APL1.

| <b>Analyte</b>                 | <b>nanomoles<sup>1</sup></b> | <b>Mass, <math>\mu\text{g}</math></b> | <b>mole %</b> |
|--------------------------------|------------------------------|---------------------------------------|---------------|
| Fucose                         | 6.68                         | 1.10                                  | 6.2           |
| <i>N</i> -acetyl galactosamine | nd                           | nd                                    | nd            |
| <i>N</i> -acetyl glucosamine   | 44.84                        | 9.92                                  | 41.7          |
| Galactose                      | nd                           | nd                                    | nd            |
| Glucose                        | nd                           | nd                                    | nd            |
| Mannose                        | 55.99                        | 10.09                                 | 52.1          |

<sup>1</sup>Total nanomoles of each residue from the hydrolyzed aliquot (~375  $\mu\text{g}$ ).

nd = not detected.



**Table S2:** X-ray data collection and refinement statistics

| Data Collection (APS)                                | LRIM1-LRR: native   | LRIM1-LRR: SeMet (peak) | LRIM1-LRR: SeMet (infl) |
|------------------------------------------------------|---------------------|-------------------------|-------------------------|
| Energy (keV)                                         | 12659               | 12659                   | 12658                   |
| Unit cell                                            | $P4_12_12$          | $P4_12_12$              | $P4_12_12$              |
| <i>a</i> , <i>b</i> (Å)                              | 79.265              | 78.822                  | 78.862                  |
| <i>c</i> (Å)                                         | 238.643             | 237.012                 | 237.184                 |
| Mosaicity (°)                                        | 0.23–0.34           | 0.15–0.57               | 0.18–0.57               |
| Resolution (Å)                                       | 50–2.00 (2.03–2.00) | 50–2.60 (2.64–2.60)     | 50–2.60 (2.64–2.60)     |
| Observations                                         | 396443              | 179341                  | 173397                  |
| Unique reflections                                   | 52399               | 23950                   | 24003                   |
| Redundancy                                           | 7.6 (4.4)           | 7.5 (6.8)               | 7.2 (5.8)               |
| Completeness (%)                                     | 99.5 (95.1)         | 99.7 (99.4)             | 99.7 (99.3)             |
| $\langle I \rangle / \langle \sigma \rangle$         | 37.6 (2.1)          | 32.4 (4.1)              | 29.4 (2.5)              |
| $\langle I \rangle / \langle \sigma \rangle > 3$ (%) | 79.1 (36.0)         | 82.5 (48.4)             | 77.0 (34.2)             |
| $R_{\text{sym}}$ (%)                                 | 6.7 (65.7)          | 7.6 (58.2)              | 8.0 (82.3)              |

  

| Data Collection (ESRF)                               | APL1-LRR: native    | LRIM1/APL1: native  |
|------------------------------------------------------|---------------------|---------------------|
| Energy (keV)                                         | 13197               | 13197               |
| Unit cell ( $P4_12_12$ )                             | $P2_12_12_1$        | $P2_12_12_1$        |
| <i>a</i> , <i>b</i> (Å)                              | 38.77, 70.35        | 109.89, 110.88      |
| <i>c</i> (Å)                                         | 161.76              | 168.32              |
| Mosaicity (°)                                        | 0.15–0.57           |                     |
| Resolution (Å)                                       | 50–1.85 (1.90–1.85) | 50–2.60 (2.64–2.60) |
| Observations                                         | 273112              | 233585              |
| Unique reflections                                   | 38500               | 56906               |
| Redundancy                                           | 7.1 (6.2)           | 4.1 (4.2)           |
| Completeness (%)                                     | 99.1 (97.2)         | 99.4 (99.7)         |
| $\langle I \rangle / \langle \sigma \rangle$         | 22.9 (7.3)          | 7.4 (2.1)           |
| $\langle I \rangle / \langle \sigma \rangle > 3$ (%) | 88.2 (60.6)         | 65.9 (39.7)         |
| $R_{\text{sym}}$ (%)                                 | 5.5 (22.4)          | 14.9 (71.5)         |

  

| Refinement                        | LRIM1-LRR             | APL1-LRR              | LRIM1/APL1            |
|-----------------------------------|-----------------------|-----------------------|-----------------------|
| Resolution (Å)                    | 47.7–2.00 (2.03–2.00) | 42.8–1.85 (1.90–1.85) | 45.6–2.70 (2.74–2.70) |
| Working set                       | 49666 (2448)          | 36543 (2349)          | 53959 (2445)          |
| Test set                          | 2665 (140)            | 1924 (131)            | 2880 (115)            |
| $R_{\text{cryst}}$ (%)            | 18.7 (25.9)           | 16.6 (18.3)           | 21.4 (26.6)           |
| $R_{\text{free}}$ (%)             | 23.3 (30.9)           | 20.6 (26.7)           | 26.0 (33.1)           |
| Est. coord. error (Å)             | 0.009                 | 0.01                  | 0.17                  |
| Est. phase error (°)              | 22.5                  | 20.2                  | 25.3                  |
| rmsd from ideal                   |                       |                       |                       |
| Bond lengths (Å)                  | 0.005                 | 0.007                 | 0.012                 |
| Bond angles (°)                   | 0.782                 | 0.848                 | 1.159                 |
| Wilson B-factor (Å <sup>2</sup> ) | 33.8                  | 19.8                  | 51.5                  |
| Atoms                             |                       |                       |                       |
| non-hydrogen                      | 5575                  | 3501                  | 8861                  |
| water                             | 491                   | 290                   | 446                   |
| Molprobit analysis                |                       |                       |                       |
| All-atom clash score              | 5.56                  | 3.23                  | 7.44                  |
| Bad rotamers (%)                  | 0.5 (3/554)           | 0.3 (1/354)           | 1.6 (15/915)          |
| Ramachandran plot                 |                       |                       |                       |
| outliers (%)                      | 0.3 (2/626)           | 0.0 (0/374)           | 0.1 (1/1006)          |
| favored (%)                       | 92.5 (579/626)        | 94.9 (355/374)        | 92.4 (930/1006)       |

**Table S3:** Radius of curvature for extracellular LRRs of known structure

| PDB ID | PROTEIN NAME                          | UNIPROT | SPECIES                         | R (Å)       |
|--------|---------------------------------------|---------|---------------------------------|-------------|
| 2OMZ   | INTERNALIN A                          | P25146  | <i>Lysteria monocytogenes</i>   | 21.4        |
| 1WWL   | CD14_MOUSE                            | P10810  | <i>Mus musculus</i>             | 22.1        |
| 3E6J   | VARIABLE LYMPHOCYTE RECEPTOR RBC36    |         | <i>Petromyzon marinus</i>       | 22.6        |
| 1GWB   | GP1BA_HUMAN                           | P07359  | <i>Homo sapiens</i>             | 22.7        |
| 2ID5   | LINGO-1 ECTODOMAIN (Q96FE5_HUMAN)     | Q96FE5  | <i>Homo sapiens</i>             | 23          |
| 2O6R   | VARIABLE LYMPHOCYTE RECEPTOR B61      | Q4G1L2  | <i>Eptatretus burgeri</i>       | 23.2        |
| 2Z80   | TOLL-LIKE RECEPTOR 2                  | O60603  | <i>Homo sapiens</i>             | 23.3        |
| 2Z64   | TOLL-LIKE RECEPTOR 4                  | Q9QUK6  | <i>Mus musculus</i>             | 23.3        |
| 1OGQ   | POLYGALACTURONASE INHIBITING PROTEIN  | P5882   | <i>Phaseolus vulgaris</i>       | 23.5        |
| 2Z7X   | TLR1                                  | Q15399  | <i>Homo sapiens</i>             | 23.5        |
| 1O6S   | INTERNALIN A                          | P25146  | <i>Lysteria monocytogenes</i>   | 23.6        |
| 2Z81   | TOLL-LIKE RECEPTOR 2                  | QUQ9N7  | <i>Mus musculus</i>             | 24          |
| 3FXI   | TOLL-LIKE RECEPTOR 4                  | O00206  | <i>Homo sapiens</i>             | 24.2        |
| 2O6S   | VARIABLE LYMPHOCYTE RECEPTOR B59      | Q4G1L3  | <i>Eptatretus burgeri</i>       | 24.8        |
| 1XEU   | INTERNALIN C                          | Q8Y6A8  | <i>Lysteria monocytogenes</i>   | 25.2        |
| 2Z66   | TOLL-LIKE RECEPTOR 4                  | O00206  | <i>Homo sapiens</i>             | 25.3        |
| 2FT3   | BIGLYCAN (PGS1_BOVIN)                 | P21809  | <i>Bos taurus</i>               | 25.5        |
| 2R9U   | VARIABLE LYMPHOCYTE RECEPTOR 2913     | Q6E4B4  | <i>Petromyzon marinus</i>       | 26.3        |
| 1ZIW   | TOLL-LIKE RECEPTOR 3                  | O15455  | <i>Homo sapien</i>              | 26.6        |
| 1G9U   | YOPM_YERPE                            | P17778  | <i>Yersinia pestis</i>          | 27.6        |
| 3BZ5   | INTERNALIN J                          | Q8Y3L4  | <i>L. monocytogenes</i>         | 27.7        |
| 2O6Q   | VARIABLE LYMPHOCYTE RECEPTOR A29      | Q32R86  | <i>Eptatretus burgeri</i>       | 28.9        |
| 2V70   | SLIT HOMOLOG 2 PROTEIN, LRR DOMAIN 3  | O94813  | <i>Homo sapiens</i>             | 29.2        |
| 1XCD   | DECORIN (PGS2_BOVIN)                  | P21793  | <i>Bos taurus</i>               | 29.4        |
| 1W8A   | SLIT PROTEIN, LRR DOMAIN 3            | P24014  | <i>Drosophila melanogaster</i>  | 29.9        |
|        | <b>APL1 LRR DOMAIN</b>                |         | <b><i>Anopheles gambiae</i></b> | <b>30.9</b> |
| 2HR7   | INSULIN RECEPTOR                      | P06213  | <i>Homo sapiens</i>             | 31.8        |
|        | <b>LRIM1 LRR DOMAIN</b>               |         | <b><i>Anopheles gambiae</i></b> | <b>36</b>   |
| 1XWD   | FOLLICLE STIMULATING HORMONE RECEPTOR | P23945  | <i>Homo sapiens</i>             | 37.1        |
| 1N8Z   | ERB2_HUMAN                            | P04626  | <i>Homo sapiens</i>             | 60.3        |

**Table S4:** LRIM1-LRR and APL1-LRR sequence<sup>1</sup>

| <b>LRIM1</b> | <b>Concave surface</b>                     | <b>Convex surface</b>                                                                                                          | <b>Length</b> |
|--------------|--------------------------------------------|--------------------------------------------------------------------------------------------------------------------------------|---------------|
| LRRNT        |                                            | AIHEIKQN                                                                                                                       |               |
| LRR I        | <sup>31</sup> GNRYKIEK <b>VTD</b>          | SSLKQALASLRQSAWN                                                                                                               | 27            |
| LRR II       | <sup>58</sup> <b>VKELDL</b> SGNPL          | SQISAADLAP <b>FTK</b>                                                                                                          | 24            |
| LRR III      | <sup>82</sup> <b>LELLNL</b> SSNVL          | YETLDLES <b>LST</b>                                                                                                            | 22            |
| LRR IV       | <sup>104</sup> <b>LRTL</b> DLN <b>NNYV</b> | QELL <b>VGPS</b>                                                                                                               | 19            |
| LRR V        | <sup>123</sup> <b>IETL</b> HA <b>ANNI</b>  | SRV <b>SC</b> SRGQ <b>GK</b>                                                                                                   | 22            |
| LRR VI       | <sup>145</sup> <b>K-NI</b> YLAN <b>KI</b>  | TMLRDLDE <b>GCRSR</b>                                                                                                          | 23            |
| LRR VII      | <sup>168</sup> <b>VQYLDL</b> KLNE <b>I</b> | DTV <b>NFAEL</b> AASS <b>DT</b>                                                                                                | 25            |
| LRR VIII     | <sup>193</sup> <b>LEHL</b> NLQY <b>NFI</b> | YDV <b>KGQV</b> FA <b>K</b>                                                                                                    | 22            |
| LRR IX       | <sup>215</sup> <b>LKTL</b> DLSS <b>NKL</b> | AF <b>MGPE</b> FQ <b>SAAG</b>                                                                                                  | 23            |
| LRR X        | <sup>238</sup> <b>VTWISL</b> R <b>NK</b> L | VL <b>IEKAL</b> R <b>F</b> SQ <b>N</b>                                                                                         | 23            |
| LRRCT        | <sup>261</sup> <b>LEHF</b> DLR <b>GNGF</b> | <b>HCGT</b> LRDFFSK <b>NQ</b> RVQ <b>T</b> VAK<br>QTVK <b>KL</b> TGQNE <b>E</b> CTVPT <b>LGH</b><br>YGAY <b>CC</b> ED <b>L</b> |               |
| C-helix      |                                            | PAPFADRL <b>LIAL</b>                                                                                                           |               |

  

| <b>APL1</b> | <b>Concave surface</b>                                       | <b>Convex surface</b>                                                                                              | <b>Length</b> |
|-------------|--------------------------------------------------------------|--------------------------------------------------------------------------------------------------------------------|---------------|
| LRRNT       |                                                              | QPEYK <b>C</b> IDS <b>N</b> LQY <b>D</b>                                                                           |               |
|             | <b>CVFYDVHI</b>                                              | DMQTQD <b>VY</b> FGFEDITL <b>NN</b>                                                                                |               |
| LRR I       | <sup>180</sup> <b>QKIV</b> TF <b>K</b> NS <b>TM</b>          | RKLPAALLDS <b>FRQ</b>                                                                                              | 24            |
| LRR II      | <sup>204</sup> <b>VELL</b> NLNDLQ <b>I</b>                   | EEIDTY <b>AF</b> AYA <b>HT</b>                                                                                     | 24            |
| LRR III     | <sup>228</sup> <b>IQKLYM</b> GF <b>NAI</b>                   | RYLPPH <b>VF</b> Q <b>N</b> VPL                                                                                    | 24            |
| LRR IV      | <sup>252</sup> <b>LTVL</b> VLER <b>N</b> DL                  | SSLPRG <b>IF</b> H <b>N</b> TP <b>K</b>                                                                            | 24            |
| LRR V       | <sup>276</sup> <b>LTTL</b> SMS <b>NN</b> L                   | ERIEDD <b>TF</b> Q <b>AT</b> TS                                                                                    | 24            |
| LRR VI      | <sup>300</sup> <b>LQNL</b> QLSS <b>N</b> RL                  | THVDLS <b>L</b> IPS                                                                                                | 21            |
| LRR VII     | <sup>321</sup> <b>LFH</b> AN <b>V</b> S <b>YN</b> LL         | STLAI <b>P</b> IA                                                                                                  | 19            |
| LRR VIII    | <sup>340</sup> <b>VEEL</b> DASH <b>NSI</b>                   | NVVRGPV <b>N</b> VE                                                                                                | 21            |
| LRR IX      | <sup>361</sup> <b>LTIL</b> KLQ <b>H</b> NN <b>L</b>          | TDTAW <b>L</b> LN <b>Y</b> PG                                                                                      | 22            |
| LRR X       | <sup>383</sup> <b>LVEV</b> DL <b>S</b> YN <b>EL</b>          | EKIMYHP <b>F</b> V <b>K</b> M <b>Q</b> R                                                                           | 24            |
| LRR XI      | <sup>407</sup> <b>LERLYI</b> S <b>NN</b> RL                  | VAL <b>N</b> LYGQ <b>P</b> I <b>P</b> T                                                                            | 23            |
| LRR XII     | <sup>430</sup> <b>LKVL</b> DL <b>S</b> H <b>N</b> HL         | LH <b>V</b> ERN <b>Q</b> P <b>Q</b> F <b>D</b> R                                                                   | 23            |
| LRR XIII    | <sup>453</sup> <b>LENLYL</b> D <b>H</b> NS <b>I</b>          | V <b>T</b> L <b>K</b> L <b>S</b> TH <b>H</b> T                                                                     | 21            |
| LRRCT       | <sup>474</sup> <b>LKNL</b> T <b>L</b> S <b>H</b> ND <b>W</b> | <b>D</b> C <b>N</b> SLRALFR <b>N</b> VARPA <b>V</b> DDA<br>DQH <b>C</b> KIDYQ <b>L</b> EHGL <b>CC</b> K <b>E</b> S |               |

<sup>1</sup>Residues in bold face lie upon the inside of the LRR solenoid. N-linked glycosylation sites are colored in green, disulfide-linked cysteines are colored in red.

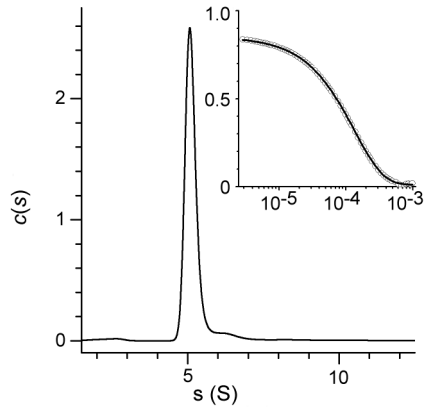

**Figure S1:** Analytical ultracentrifugation (AUC) of the LRIM1/APL1C- $\Delta$ 26-130 complex. The complex sedimented as a single species with a sedimentation coefficient of  $s = 5.10 \pm 0.04$  S at 20 °C in PBS. (Inset) Dynamic light scattering (DLS) of LRIM1/APL1C- $\Delta$ 26-130 complex, autocorrelation coefficient versus  $\log_{10}(t)$ . Fitted curve corresponds to a single species ( $\sim 5\%$  polydispersity) with diffusion coefficient  $D = 3.6 \times 10^{-7}$  cm<sup>2</sup>/s.

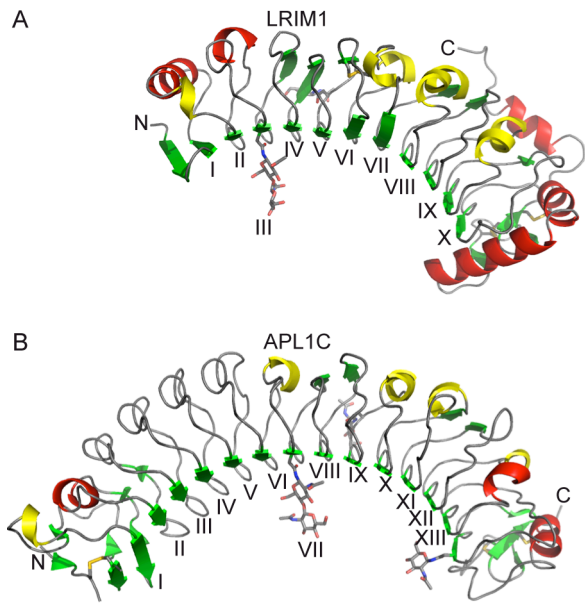

**Figure S2:** (A) Structure of LRIM1-LRR and (B) structure of APL1C-LRR. N- and C-termini are labeled; concave  $\beta$ -strands are numbered according to Table S4. Ribbons colored according to secondary structure:  $\alpha$ -helices in red,  $\beta$ -strands in green,  $3_{10}$ -helices in yellow, loops in grey. *N*-acetylglucosamines in LRIM1-LRR are shown linked to Asn 86 (LRR III) and Asn 132 (behind LRR V). *N*-acetylglucosamines in APL1C-LRR are shown linked to Asn 325 (LRR VII), Asn 370 (behind LRR IX) and Asn 476 (LRR XIV).

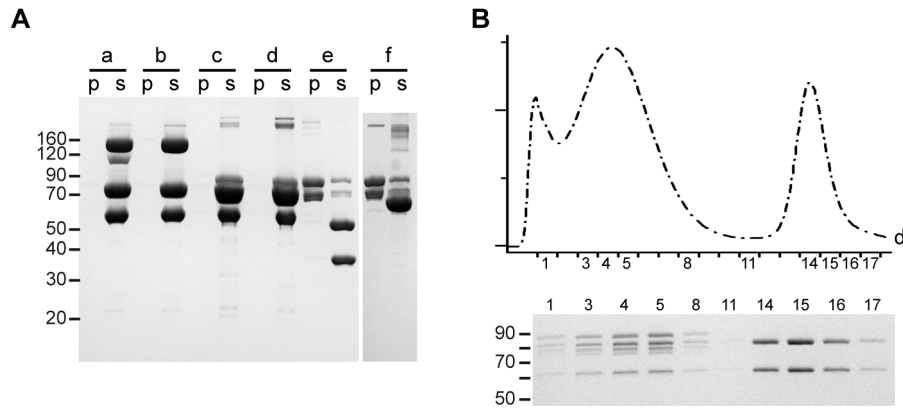

**Figure S3:** (A) Precipitate (p) and soluble (s) fractions for the following reactions after 12 h incubation at room temperature: (a) TEP1 + LRIM1/APL1, (b) TEP1(MeNH<sub>2</sub>) + LRIM1/APL1, (c) TEP1<sub>cut</sub> + LRIM1/APL1, (d) TEP1<sub>cut</sub>(MeNH<sub>2</sub>) + LRIM1/APL1, (e) TEP1<sub>cut</sub>(MeNH<sub>2</sub>) + LRIM1-LRR + APL1-LRR, (f) TEP1<sub>cut</sub>(MeNH<sub>2</sub>) + BSA. (B) Elution (d) TEP1<sub>cut</sub>(MeNH<sub>2</sub>) + LRIM1/APL1 on Superose6 10/30 size-exclusion column (GE Healthcare), 0.5 ml fractions. Silver-stained SDS-PAGE gel of selected fractions for TEP1/LRIM1/APL1 ternary complex (peak 3-5) and LRIM1/APL1 heterodimer (peak 14-16). The equivalent staining of bands in the ternary complex suggests a 1:1 ratio of TEP1 to LRIM1/APL1.

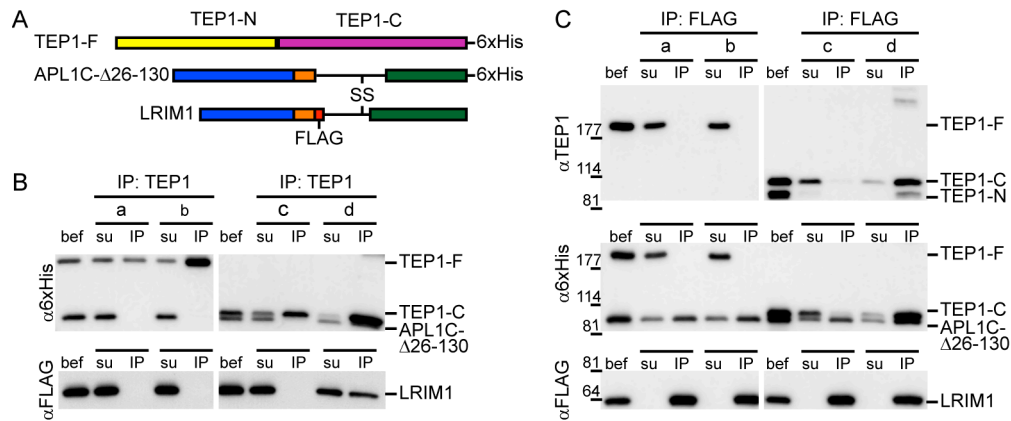

**Figure S4:** Immunoprecipitation (IP) of TEP1/LRIM1/APL1C-Δ26-130 samples (a-d) (see text).

(A) A schematic diagram illustrates the antigens present in solution before IP (bef); αFLAG recognizes and IPs LRIM1 and co-IPs APL1C. αTEP1 recognizes and IPs full-length TEP1 (TEP1-F) and TEP1<sub>cut</sub> fragments TEP1-N and TEP1-C. α6xHis recognizes TEP1-F, TEP1-C and APL1C. (B) For αTEP1 IP of (a) TEP1, (b) TEP1(MeNH<sub>2</sub>) and (c) TEP1<sub>cut</sub>, LRIM1 and APL1C remain in the supernatant, but (d) TEP1<sub>cut</sub>(MeNH<sub>2</sub>) co-IPs LRIM1/APL1C. (C) For αFLAG IP of LRIM1/APL1C, (a) TEP1, (b) TEP1(MeNH<sub>2</sub>) and (c) TEP1<sub>cut</sub> remain in the supernatant (su) while (d) TEP1<sub>cut</sub>(MeNH<sub>2</sub>) co-IPs with LRIM1/APL1C.
